# Supplementary material for: Bronchoscopic Endobronchial Valve Therapy for Persistent Air Leaks in COVID-19 Patients Requiring Veno-Venous Extracorporeal Membrane Oxygenation
Source: MDPI journal article supplement (doi:10.3390/jcm12041348), 2023-02-08
Supplement: s1 [file s1]

# **Bronchoscopic Endobronchial Valve Therapy for Persistent Air Leaks in COVID-19 Patients Requiring Veno-Venous Extracorporeal Membrane Oxygenation**

*Barbara Ficial, Stephen Whebell, Daniel Taylor, Rita Fernández-Garda, Lawrence Okiror,  
and Christopher I. S. Meadows*

***Supplementary Material***

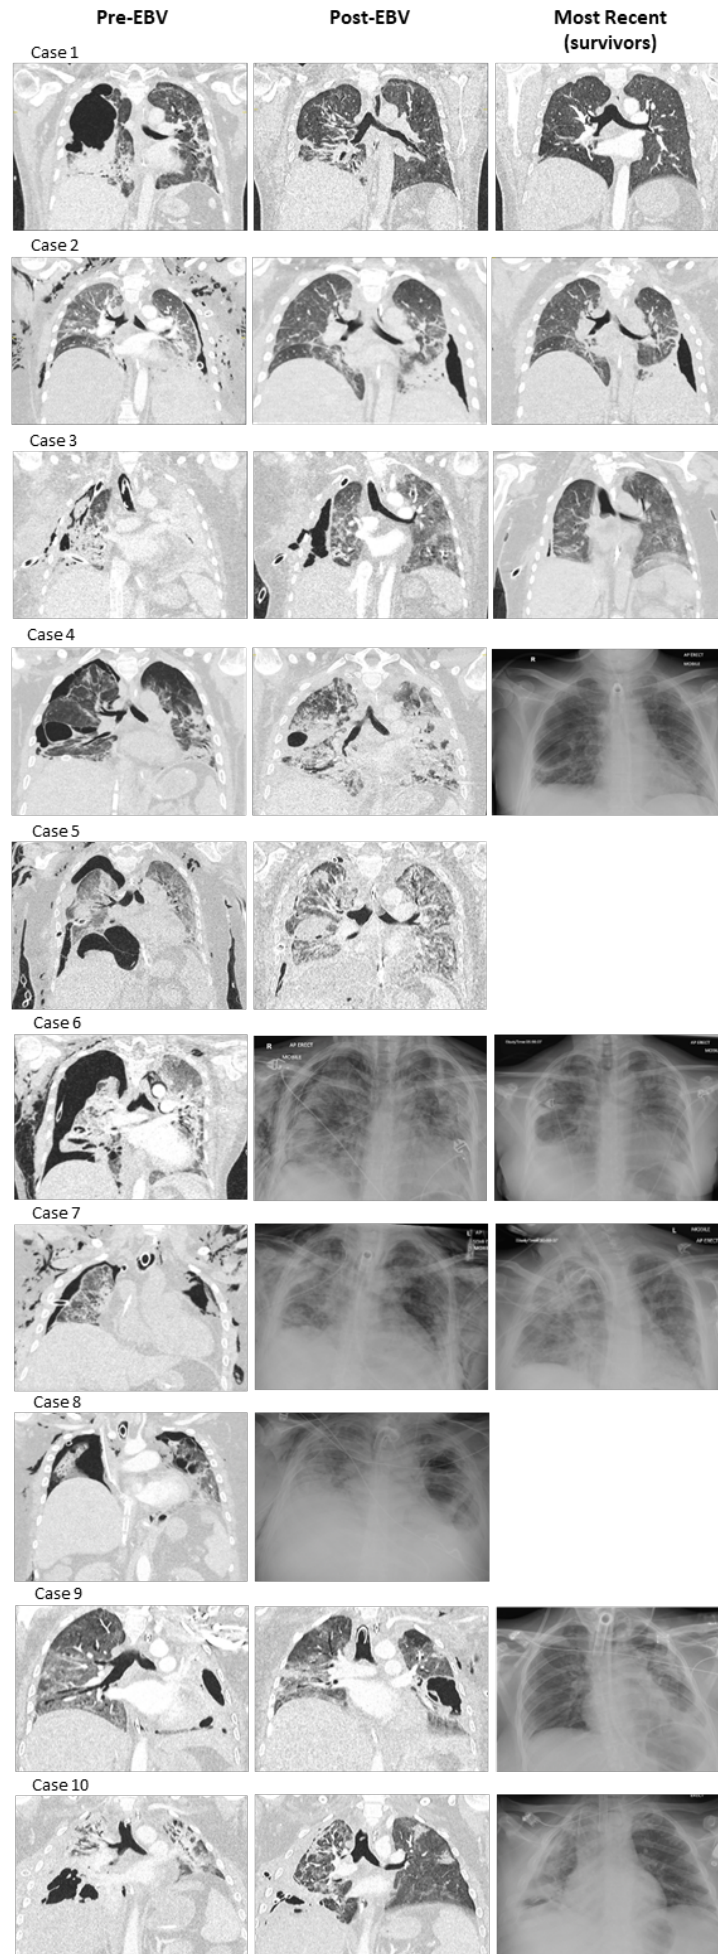

Supplementary Figure SA: Imaging of all cases before EBV placement, after EBV placement and the most recent imaging available for survivors  
 CT imaging used where available, plain film x-ray presented otherwise  
 EBV – endobronchial valve
